# Supplementary material
Source: PubMed Central journal article supplement (PMC3554327)

Figure 1.

A

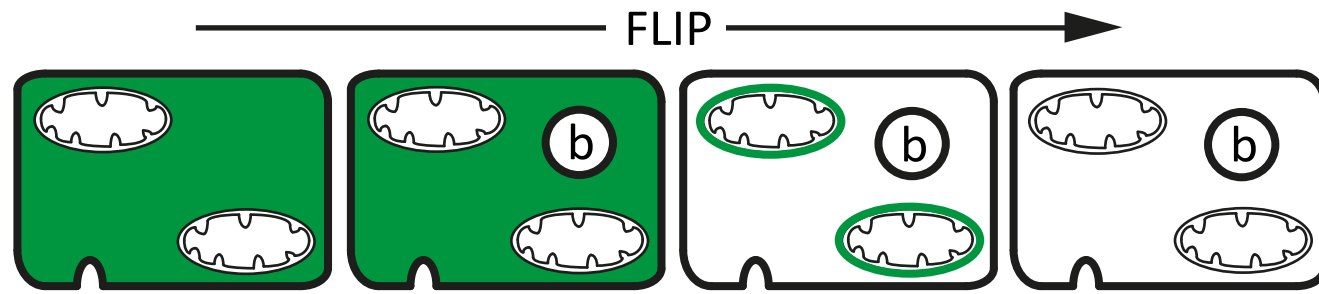

C

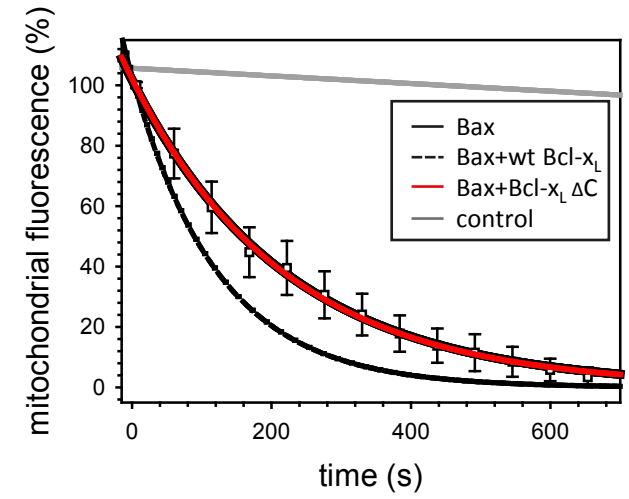

B

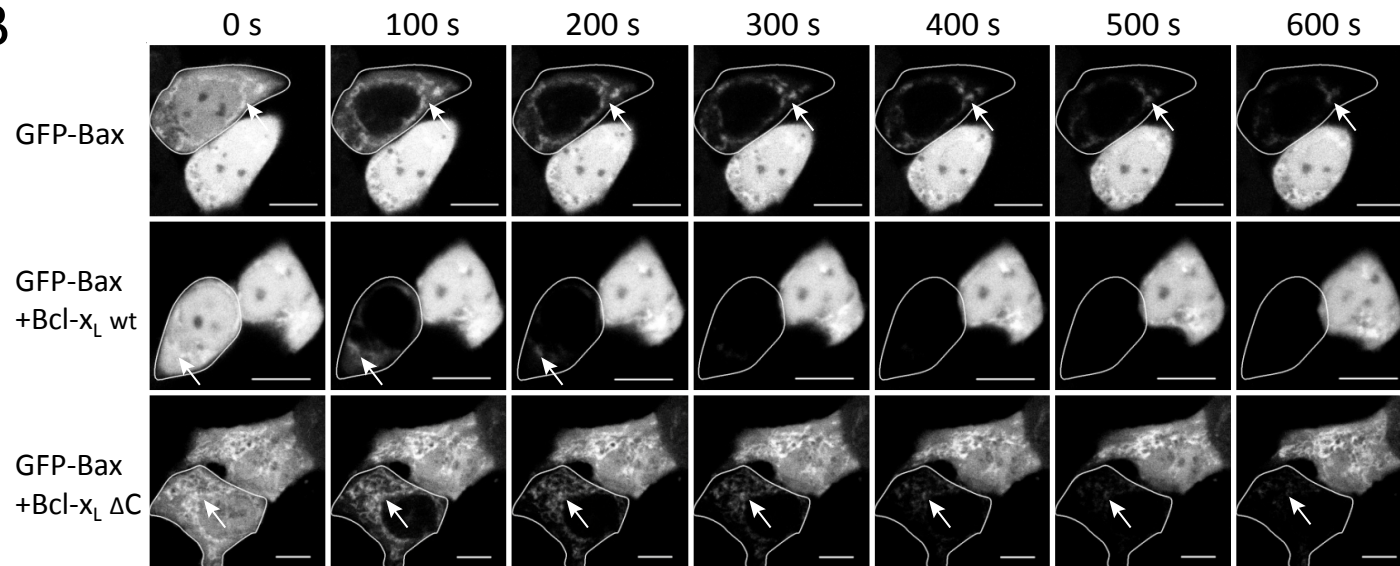

Figure 2.

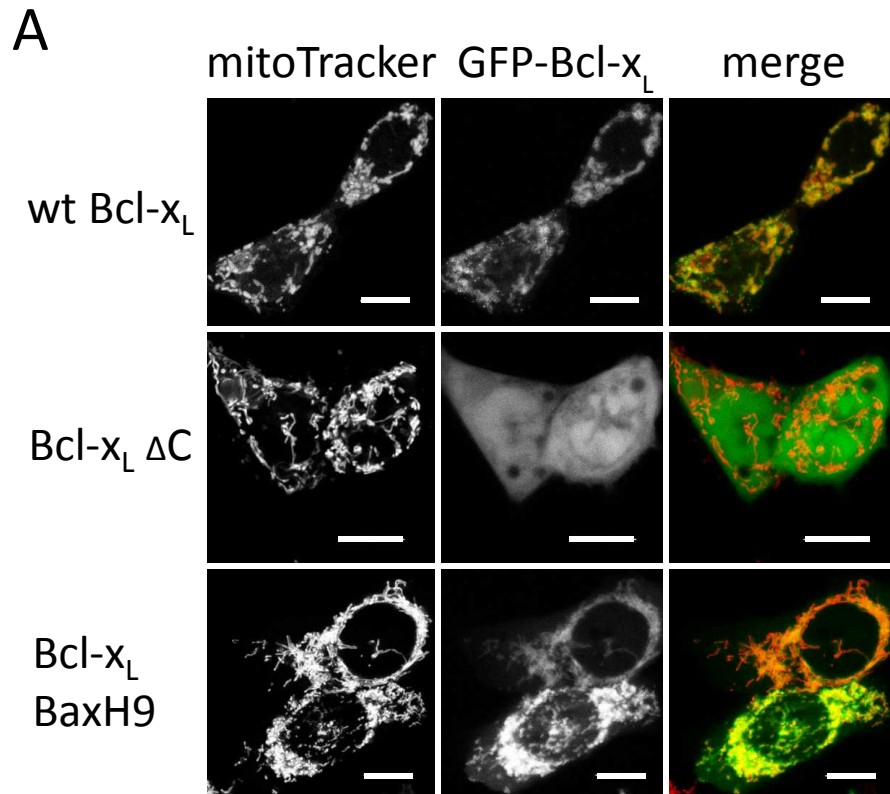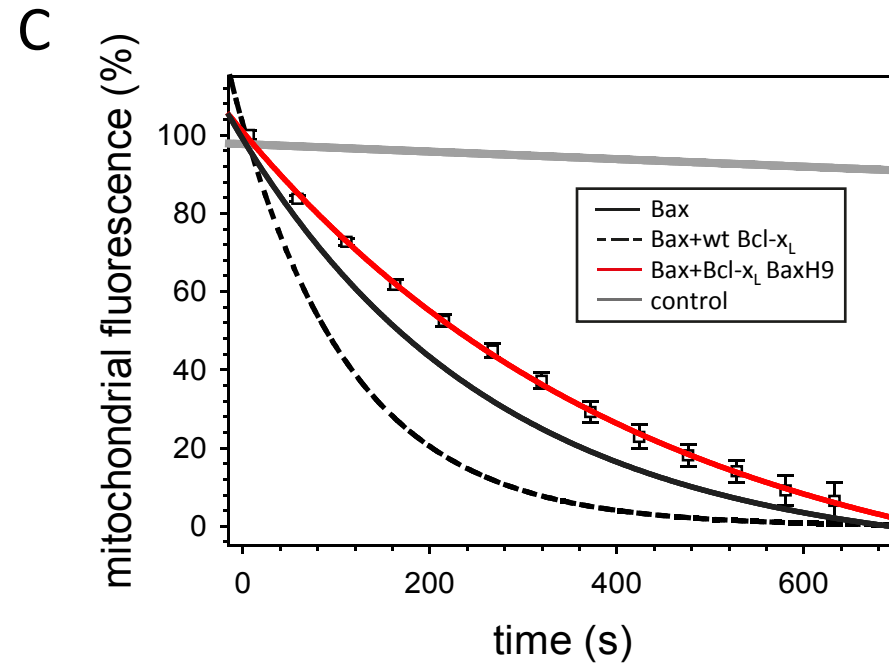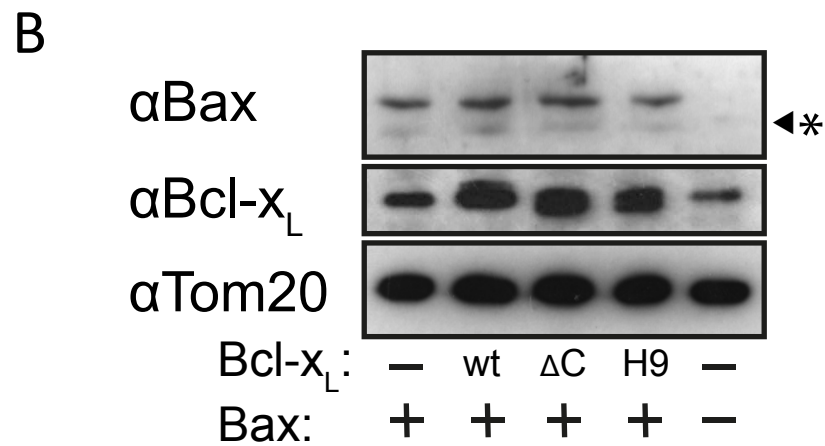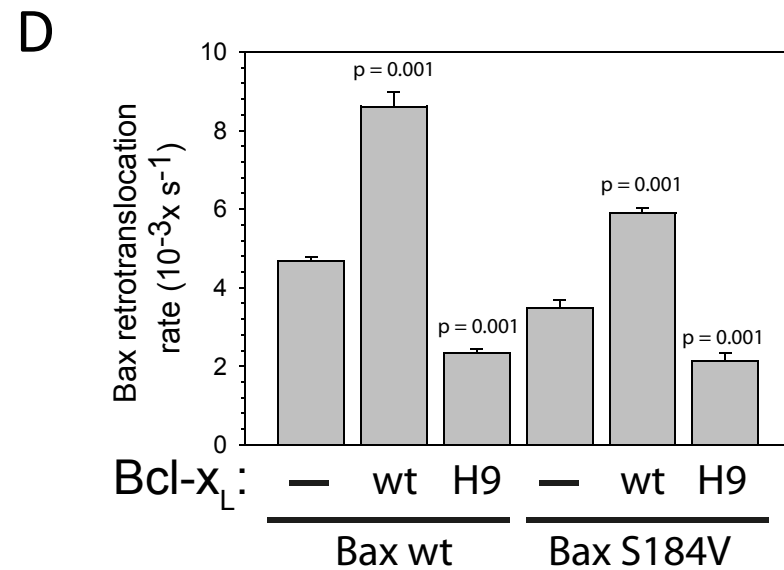

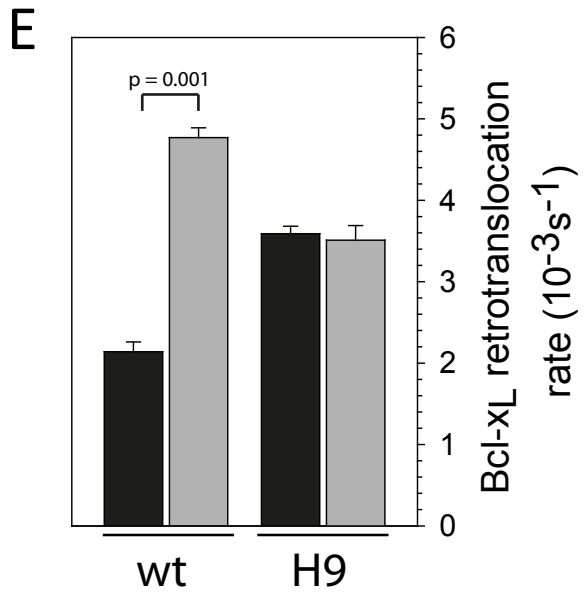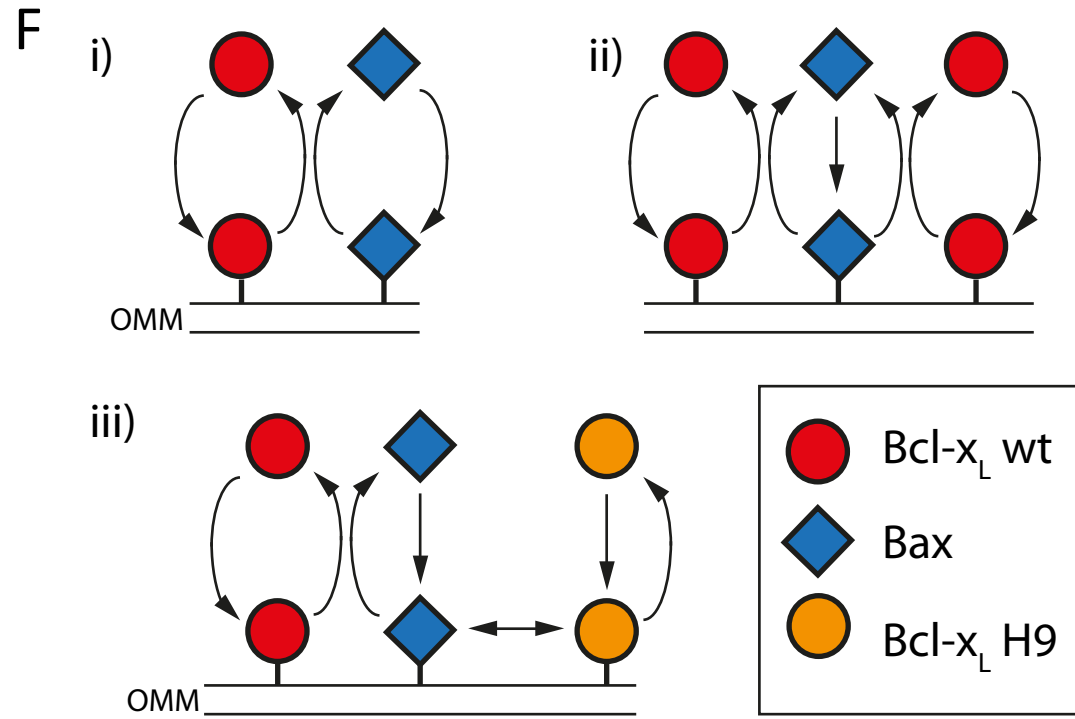

Figure 3.

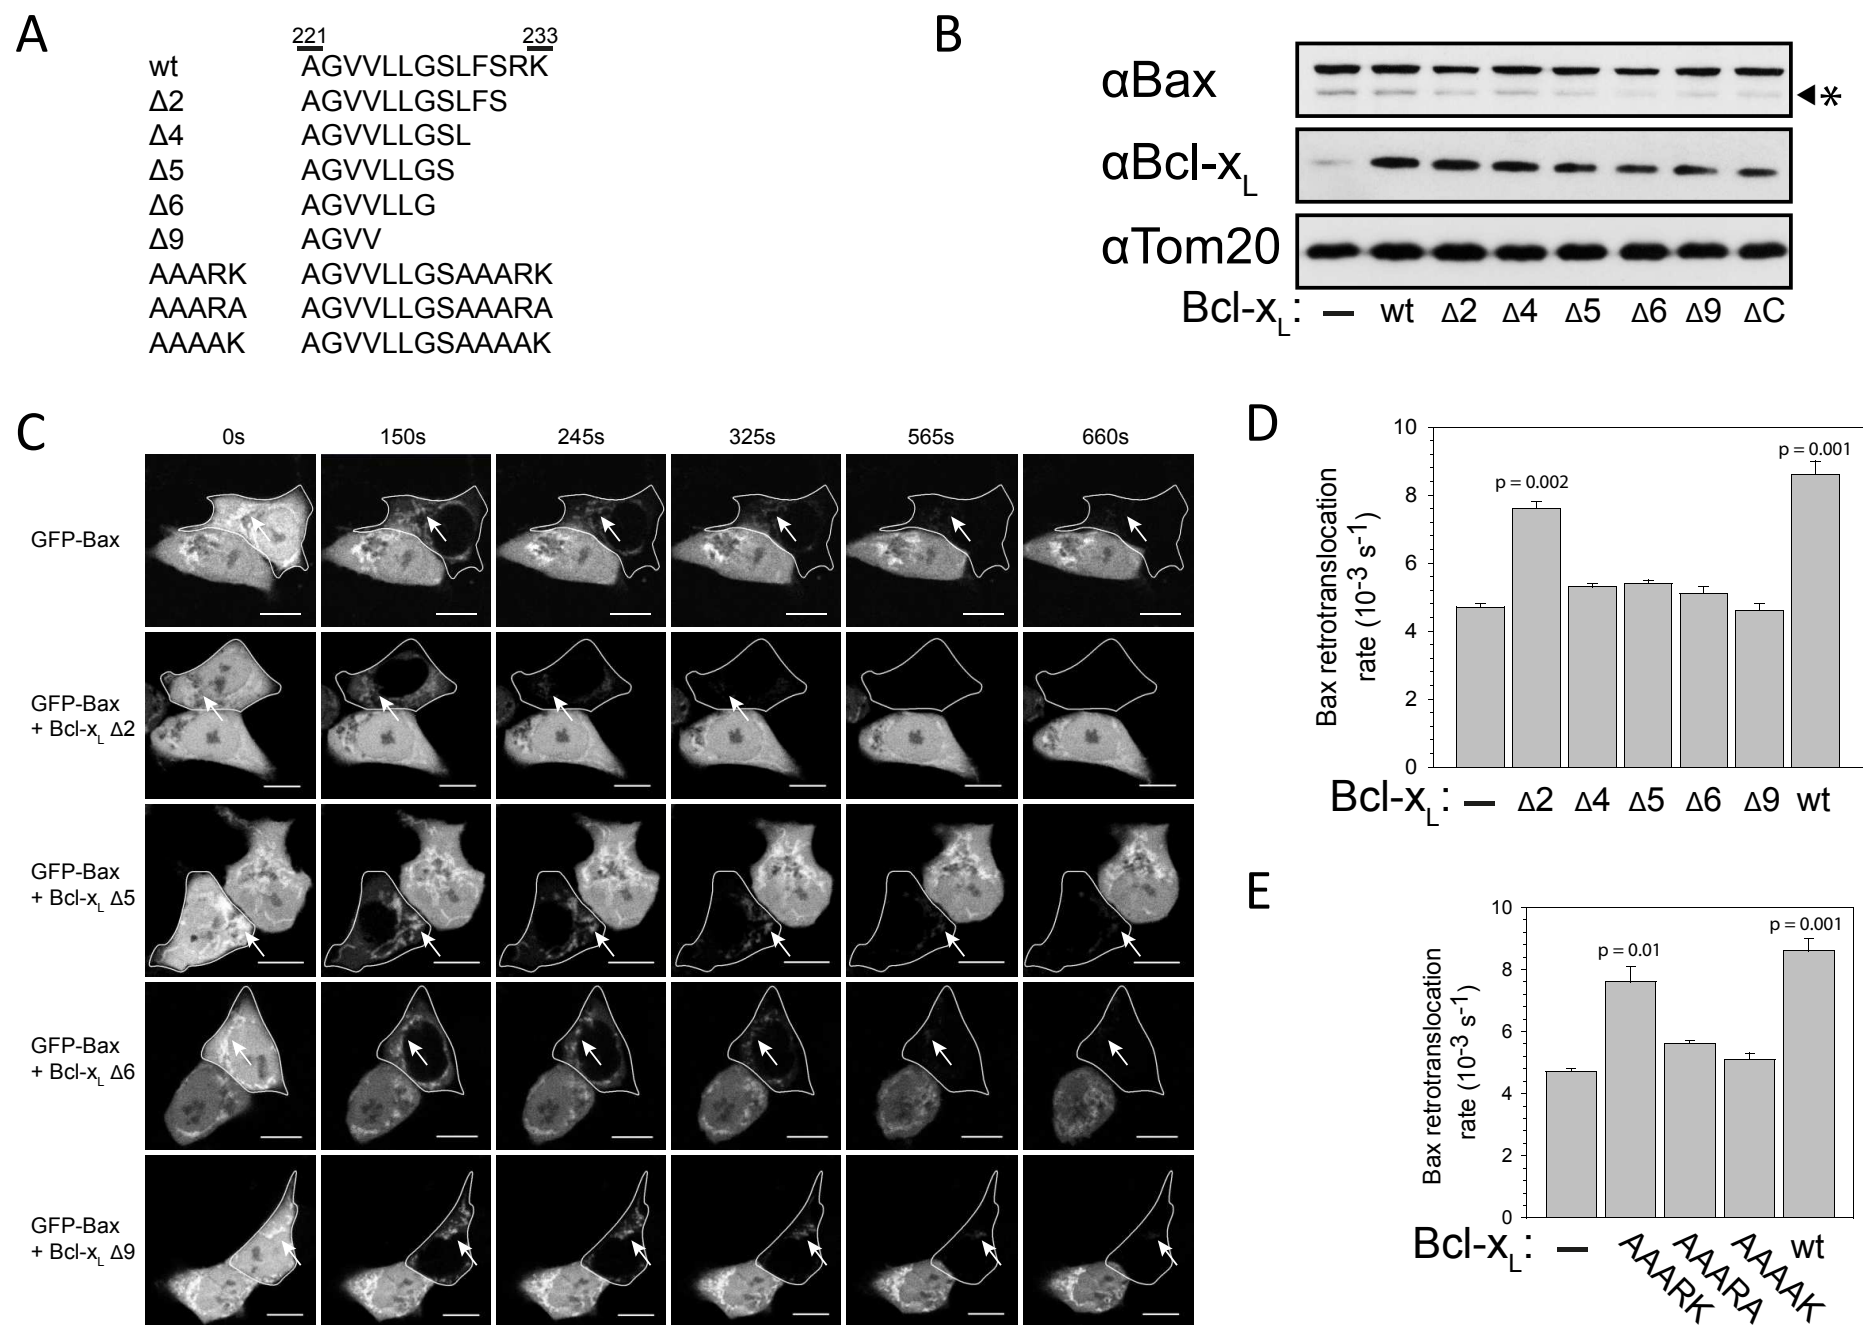

Figure 4.

A

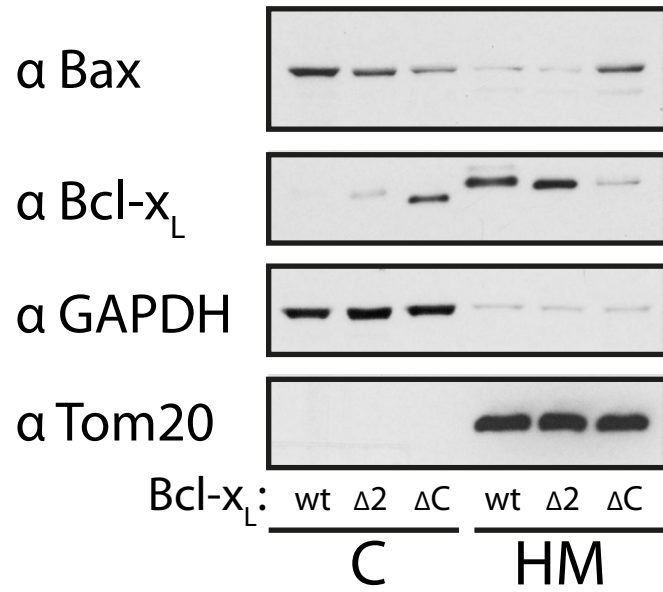

C

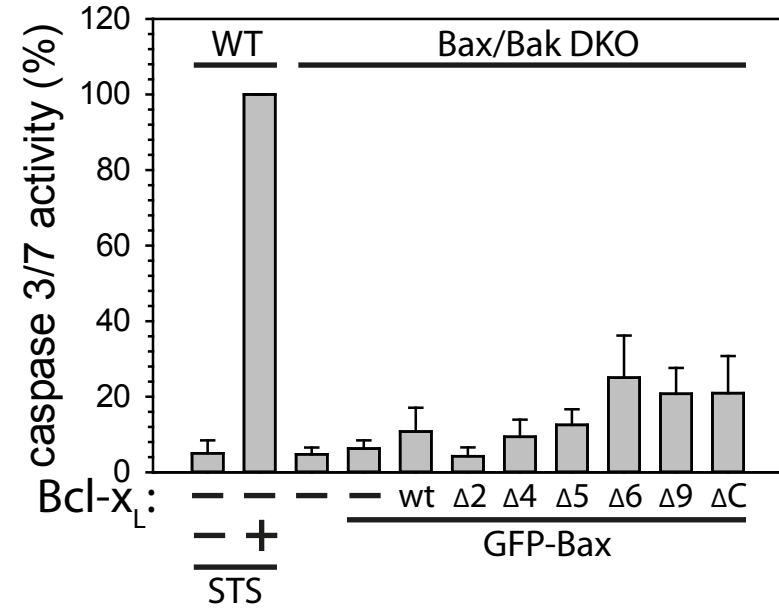

B

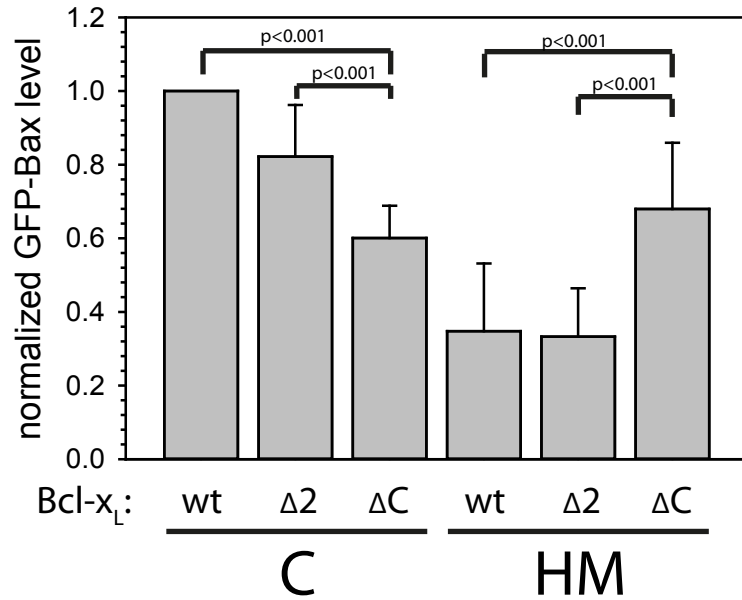

D

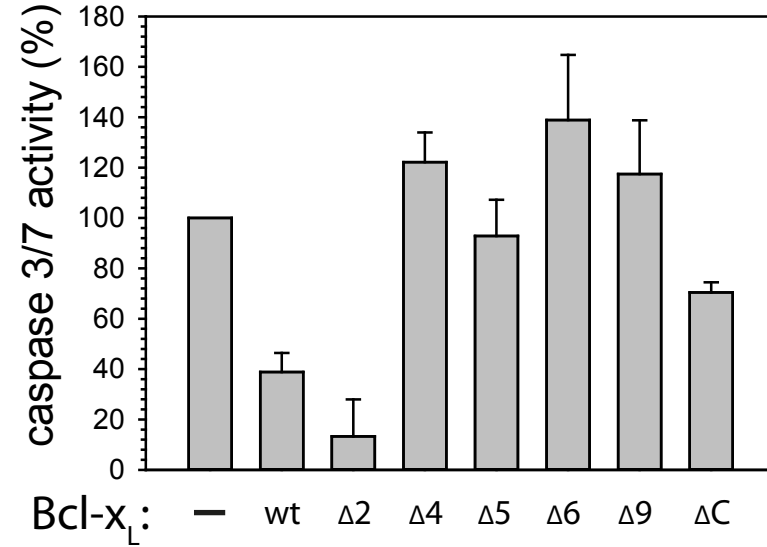

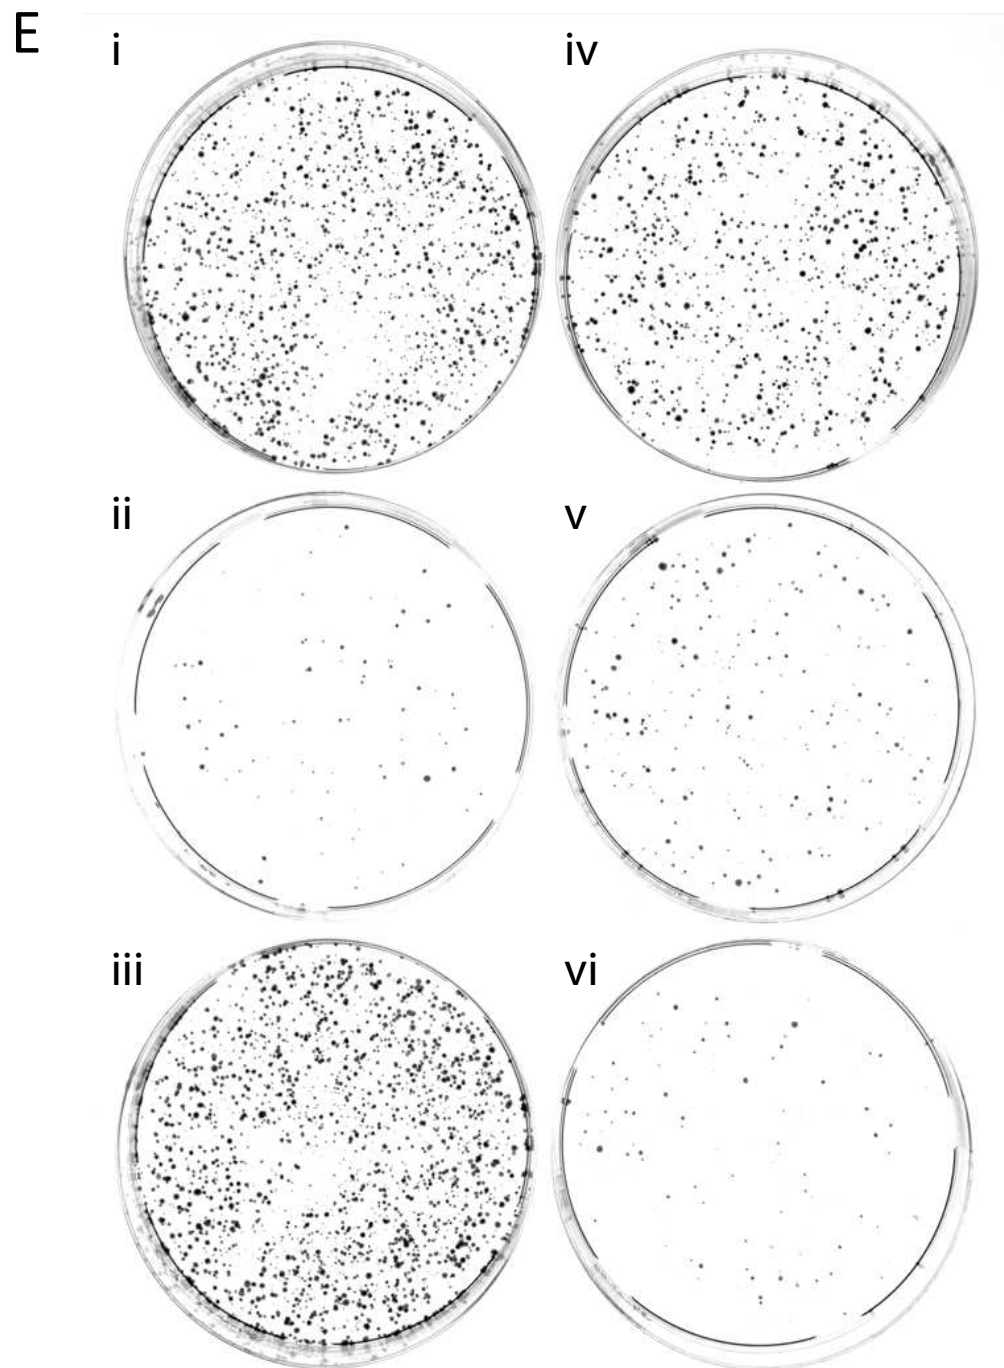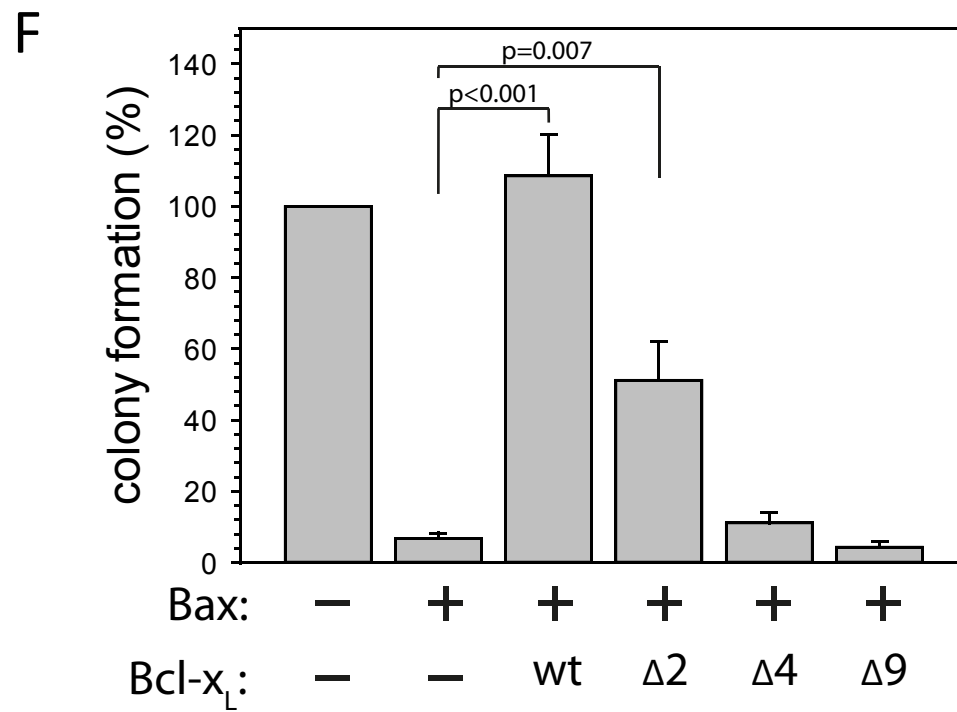



Figure 5.

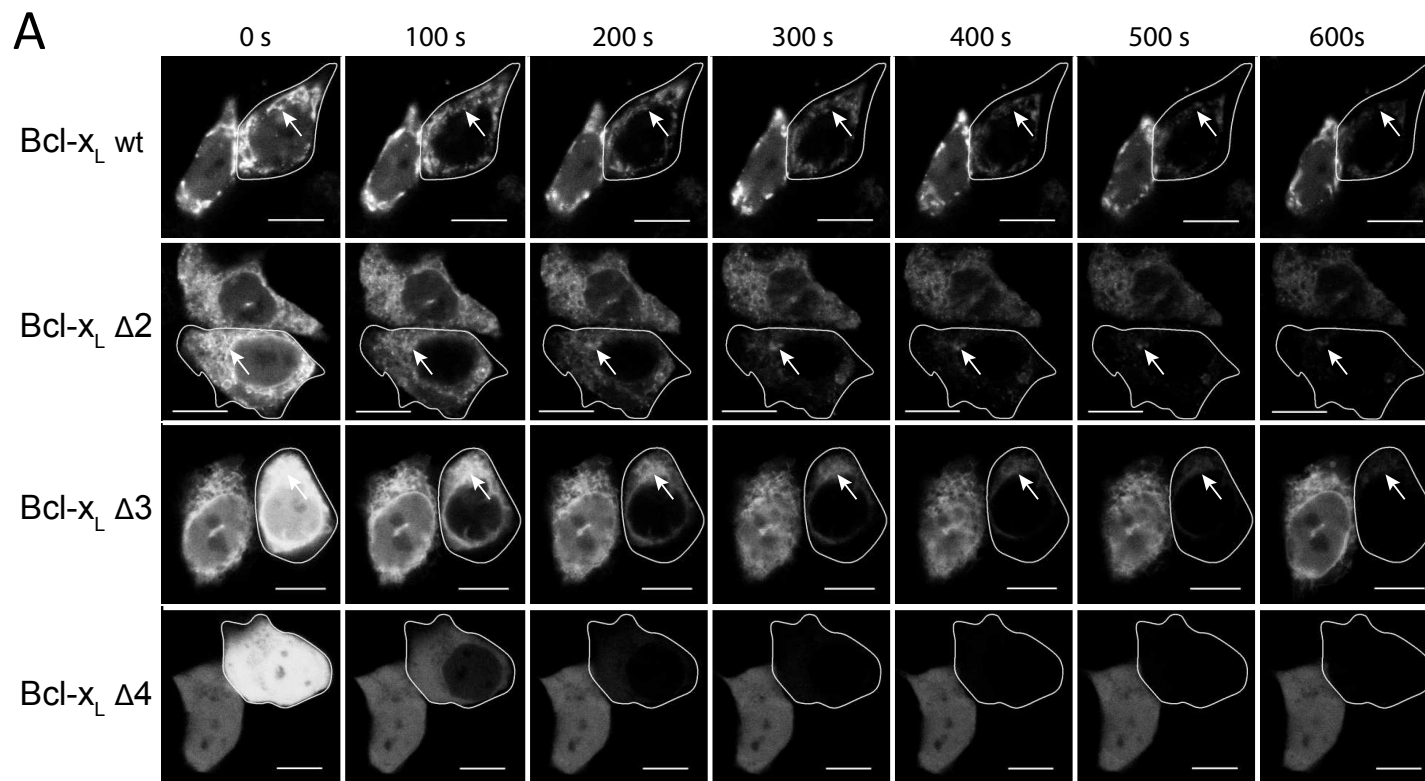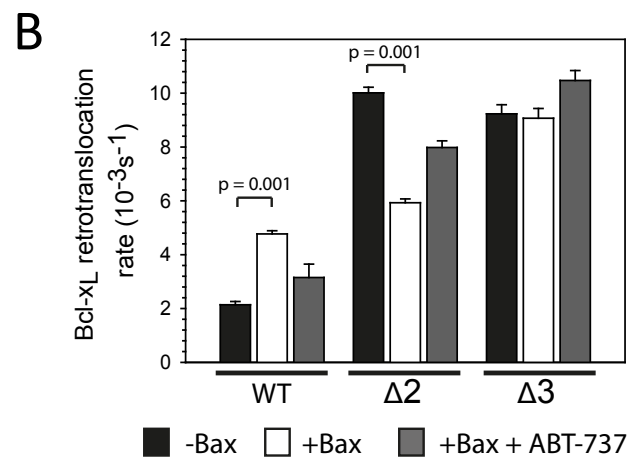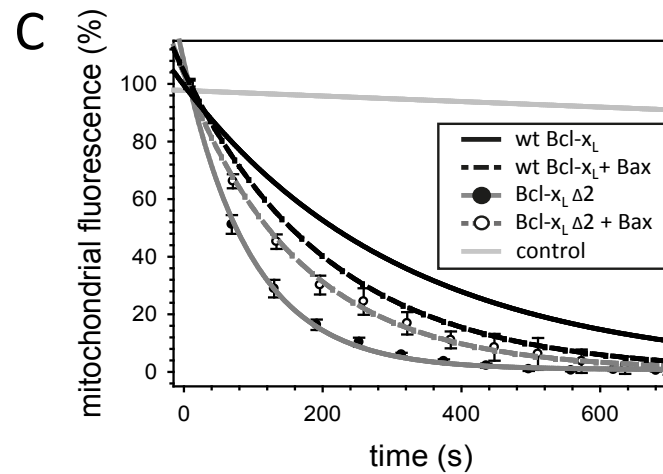

Figure 6.

A

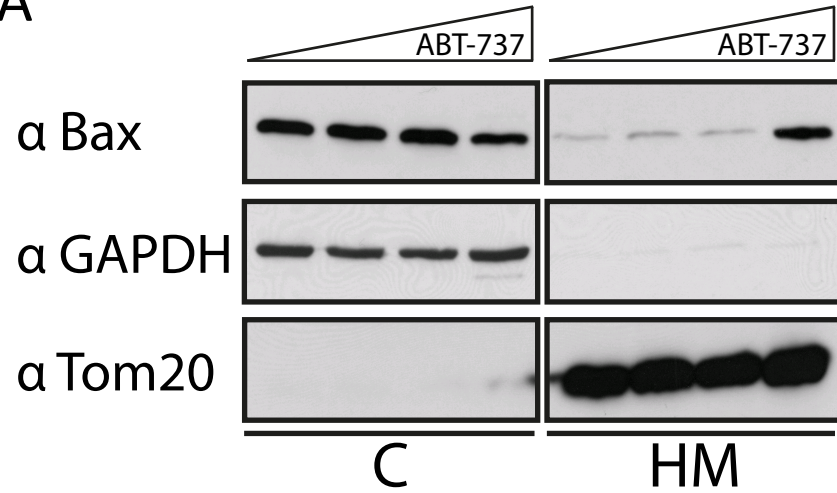

C

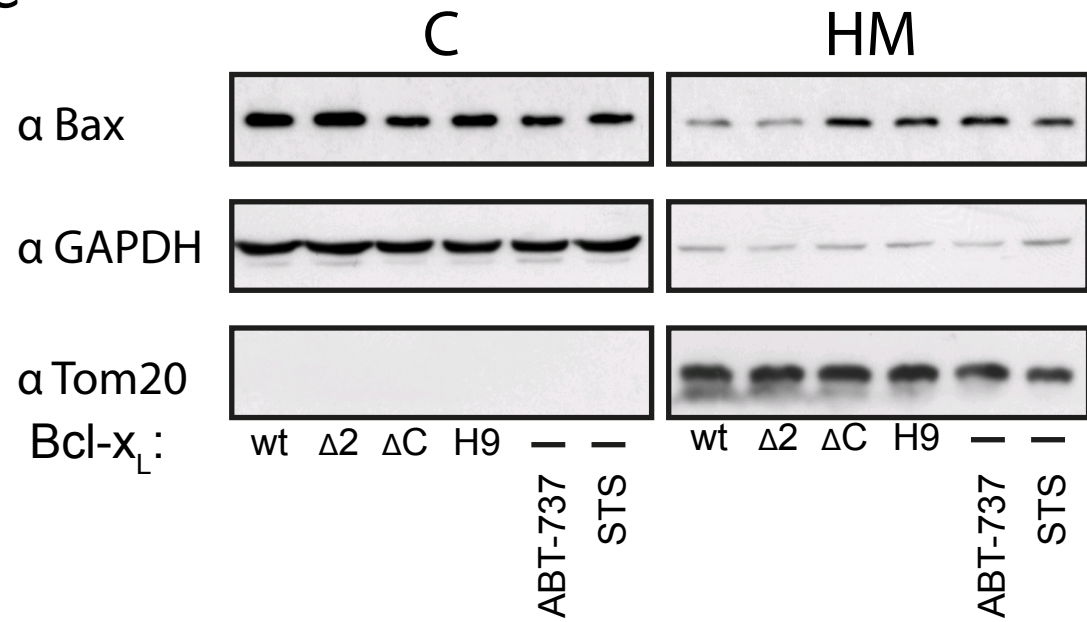

B

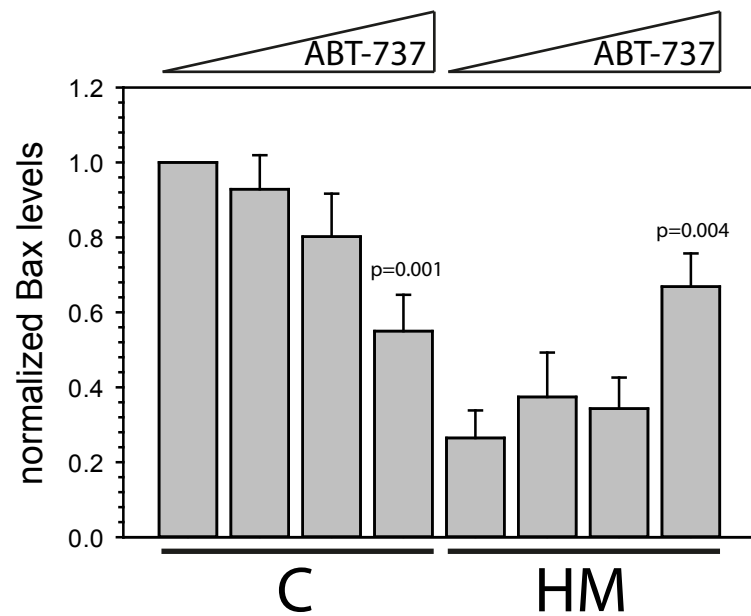

D

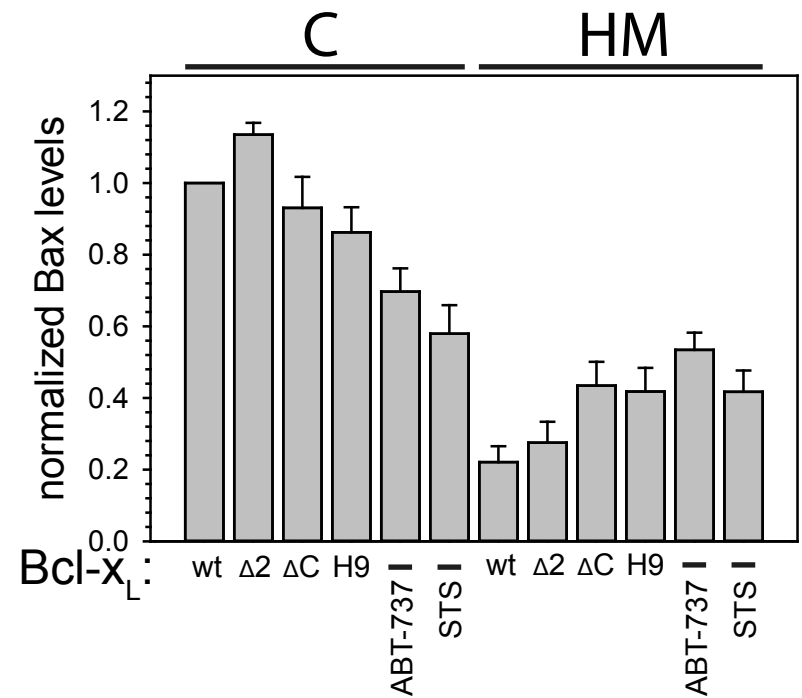



E

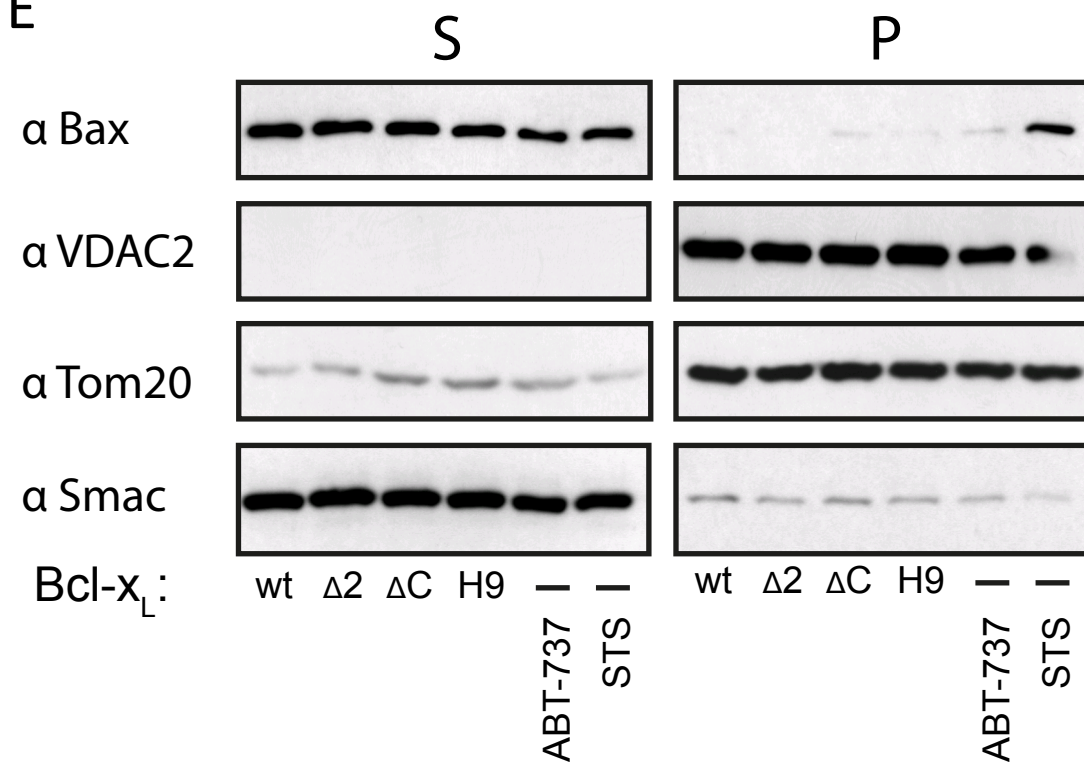

**Table S1.** Bcl-x<sub>L</sub> C-terminal deletions diminish Bax retrotranslocation and inhibition

| Bcl-x <sub>L</sub> | Bax retro-translocation | inhibition of Bax activation | cell survival after STS treatment | mitochondrial localization |
|--------------------|-------------------------|------------------------------|-----------------------------------|----------------------------|
| wt                 | ++++                    | ++++                         | ++++                              | ++++                       |
| Δ2                 | +++                     | ++++                         | ++                                | ++                         |
| Δ4                 | +                       | -                            | -                                 | ++                         |
| Δ5                 | +                       | -                            | ND                                | -                          |
| Δ6                 | +                       | -                            | -                                 | ND                         |
| Δ9                 | -                       | -                            | -                                 | ND                         |
| ΔC                 | -                       | -                            | ND                                | ND                         |
| AAARK              | +++                     | ND                           | ND                                | ++ <sup>1</sup>            |
| AAARA              | +                       | ND                           | ND                                | ++ <sup>1</sup>            |
| AAARA              | -                       | ND                           | ND                                | ++ <sup>1</sup>            |

1 = see Jeong et al.<sup>22</sup>

# Supplementary Figure 1

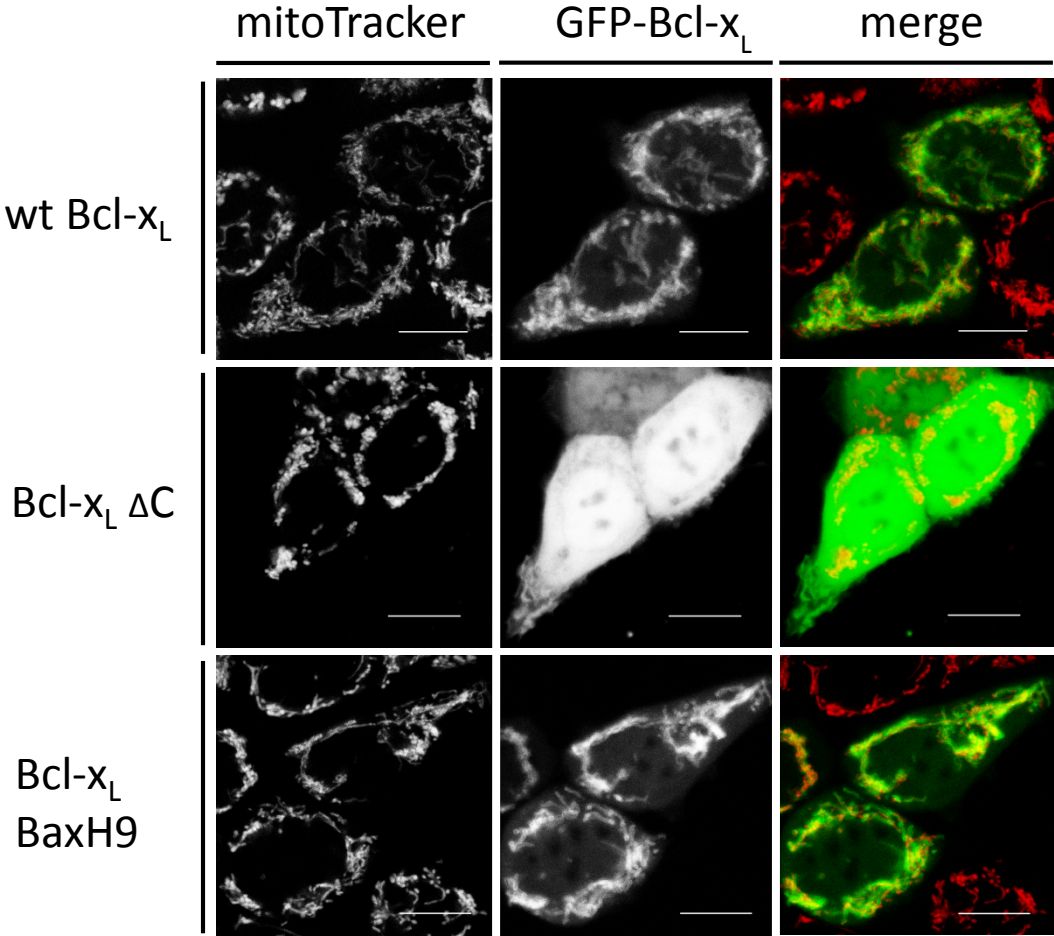

# Supplementary Figure 2

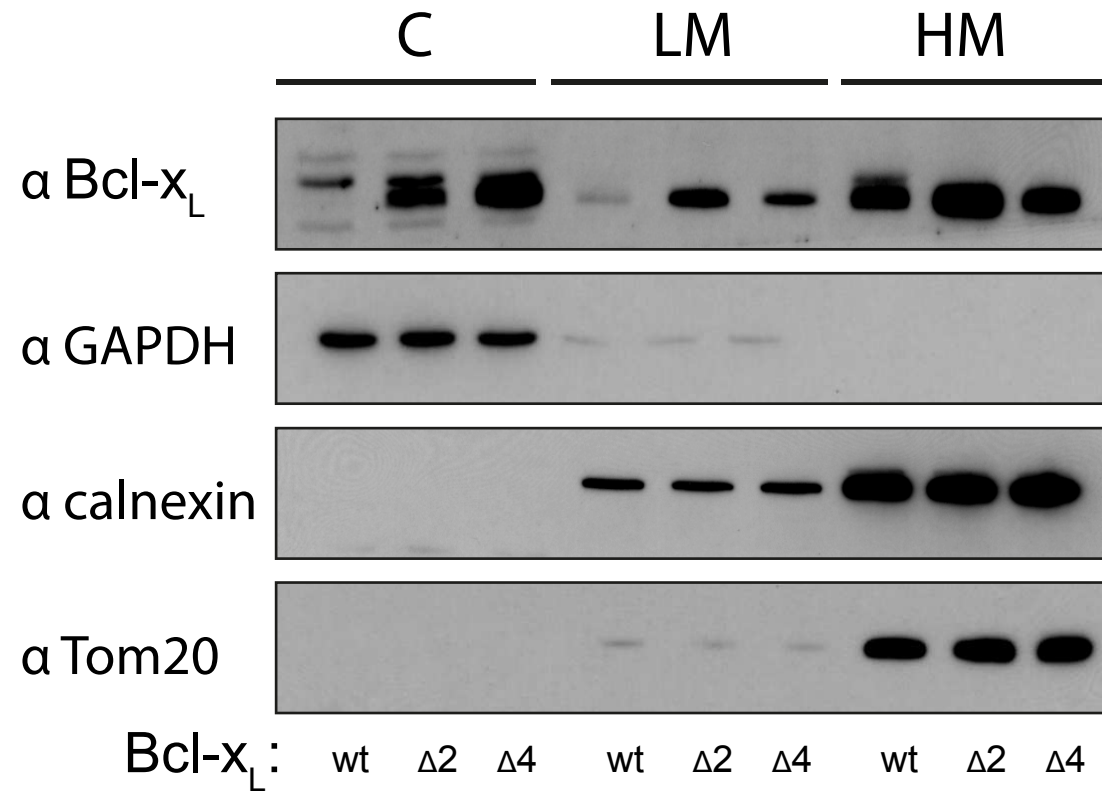

# Supplementary Figure 3

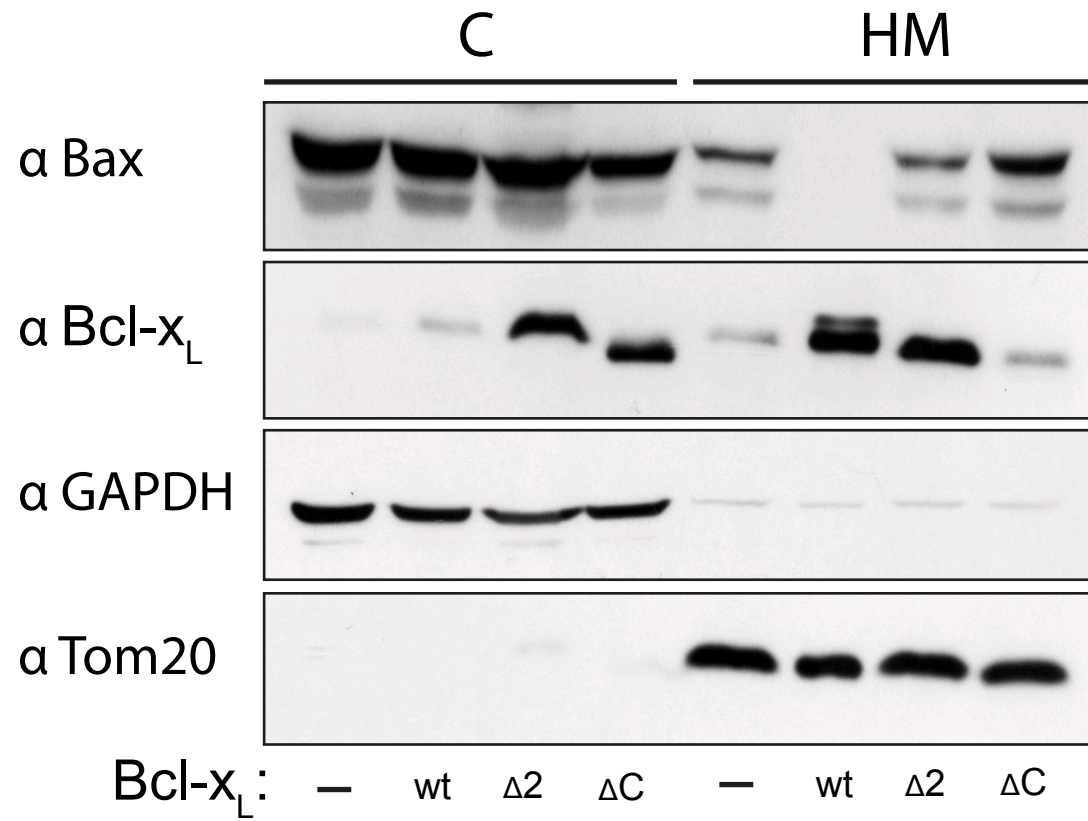

Supplementary Figure 4

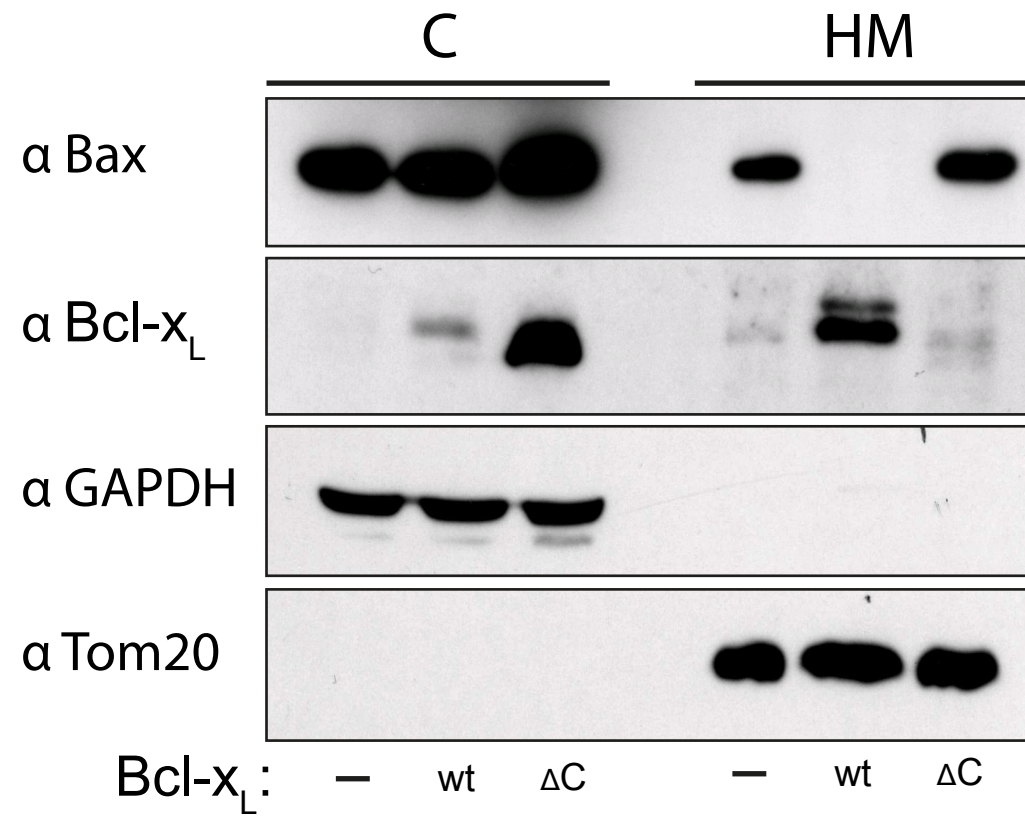

Supplement: cdd2012131x1.pdf [file cdd2012131x1.pdf]
